# Supplementary material for: Influence of microorganisms on uranium release from mining-impacted lake sediments under various oxygenation conditions
Source: Royal Society of Chemistry journal article supplement (doi:10.1039/d2em00104g), 2022-01-01
Supplement: d2em00104g1.pdf [file d2em00104g1.pdf]

**Supplementary Material**

**Influence of microorganisms on uranium release from mining-  
impacted lake sediments under various oxygenation conditions**

Marina Seder-Colomina<sup>a</sup>, Arnaud Mangeret<sup>a,\*</sup>, Pascale Bauda<sup>b</sup>, Jessica Brest<sup>c</sup>, Lucie Stetten<sup>a,c</sup>,  
Pauline Merrot<sup>c</sup>, Anthony Julien<sup>a</sup>, Olivier Diez<sup>a</sup>, Evelyne Barker<sup>a</sup>, Elise Billoir<sup>b</sup>, Pascal  
Poupin<sup>b</sup>, Antoine Thouvenot<sup>d</sup>, Charlotte Cazala<sup>a</sup>, Guillaume Morin<sup>c</sup>

<sup>a</sup>Institut de Radioprotection et de Sûreté Nucléaire, IRSN, PRP-DGE, 31 avenue de la  
Division Leclerc, 92262 Fontenay-aux-Roses, France.

<sup>b</sup> Université de Lorraine, CNRS, LIEC, F-57000 Metz, France

<sup>c</sup>Institut de Minéralogie, de Physique des Matériaux et de Cosmochimie (IMPMC), UMR  
7590 CNRS-UPMC-IRD-MNHN, case 115, 4 place Jussieu, 75252 Paris Cedex 5, France

<sup>d</sup>Université de Clermont Ferrand, Athos Environnement, 63171 Aubière, France

to be submitted to

Environmental Science: Processes & Impacts

\*Corresponding author: [arnaud.mangeret@irsn.fr](mailto:arnaud.mangeret@irsn.fr)

Tel +33 1 58 35 76 95

Fax +33 1 46 57 62 58

This file contains 18 pages, 5 figures and 6 tables. Table S7 showing the Spearman correlation matrix between prototypes and Table S8 listing the different OTUs identified associated to their respective prototype are inserted as external Excel© files.

- **Figure S1.** Sediment sampling site location
- **Figure S2.** Scheme of incubation experiments
- **Figure S3.** Total Organic Carbon
- **Figure S4.** Major elements in solution
- **Figure S5** Rarefaction curves of observed OTU
- **Figure S6** Non-parametric multidimensional scaling (NMDS) plot of prokaryotic communities.
- **Figure S7** Heat map and hierarchical cluster analysis of log-transformed abundances of the 30 most abundant OTUs for the initial sediments (A) and after 3 weeks of incubation under 0% O<sub>2</sub> and 100% O<sub>2</sub>.
- **Table S1** Richness and diversity indices of the initial and exposed prokaryotic communities
- **Table S2.** XANES LC-LS fitting components of Figure 2 XAS data.
- **Table S3** Formation constants of minerals and complexes and their relevant reactions used for this study.
- **Table S4** Calculation of aqueous U(IV) and U(VI) speciation and determination of major and minor U(IV) and U(VI) complexes at each set of experimental conditions with fresh sediments.
- **Table S5** Calculation of aqueous U(IV) and U(VI) speciation and determination of major and minor U(IV) and U(VI) complexes at each set of experimental conditions with irradiated sediments.

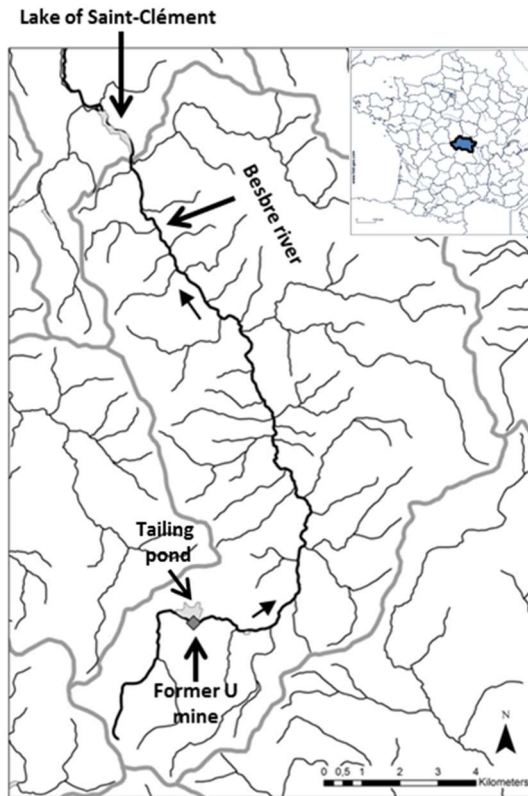

**Figure S1.** Sediment sampling site location. Lake Saint-Clément is located in Allier, Massif Central, France. The lake is supplied by the Besbre River that drains the discharges from the Bois-Noirs tailing pond treated water, located 20 km upstream from the lake.

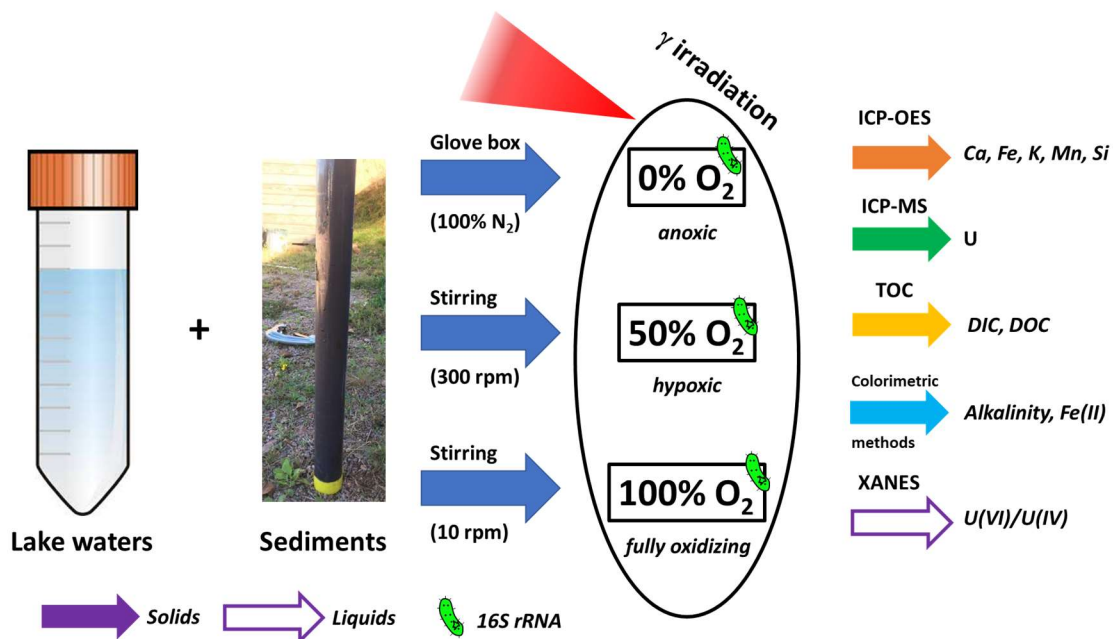

**Figure S2.** Description of the experimental and analytical procedures of the incubation experiments.

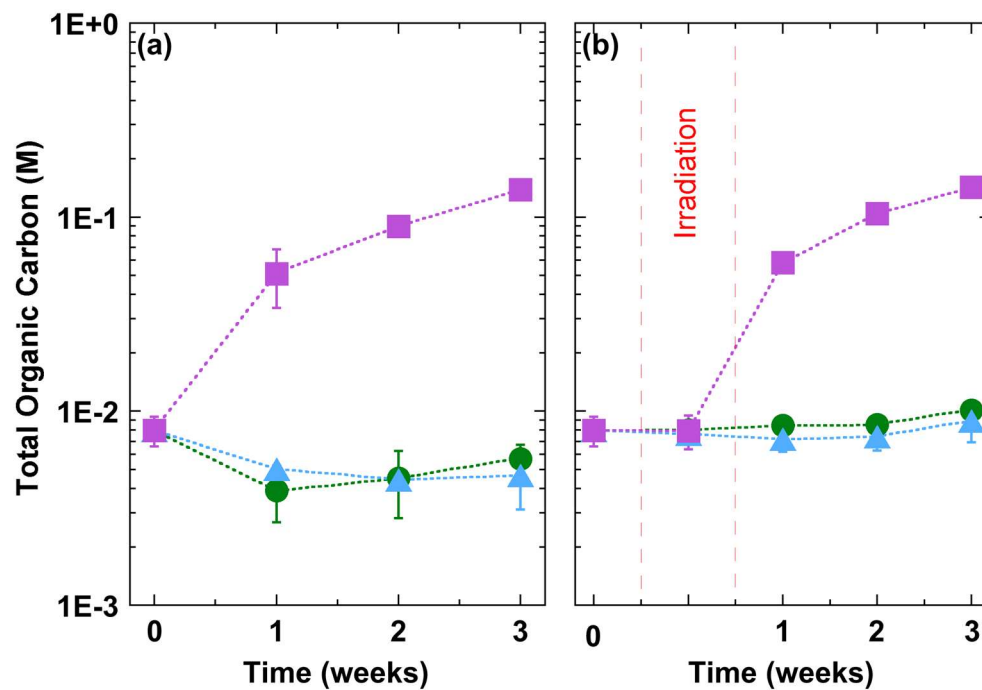

**Figure S3.** Total Organic Carbon in solution for (left) fresh and (right) irradiated sediments, throughout 3-week incubation under different O<sub>2</sub> conditions: green circles (●), 100% O<sub>2</sub> incubation; blue triangles (▲), 50% O<sub>2</sub> incubation and purple squares (■), 0% O<sub>2</sub> incubation. Error bars represent the standard deviation over the 3 replicates for each condition.

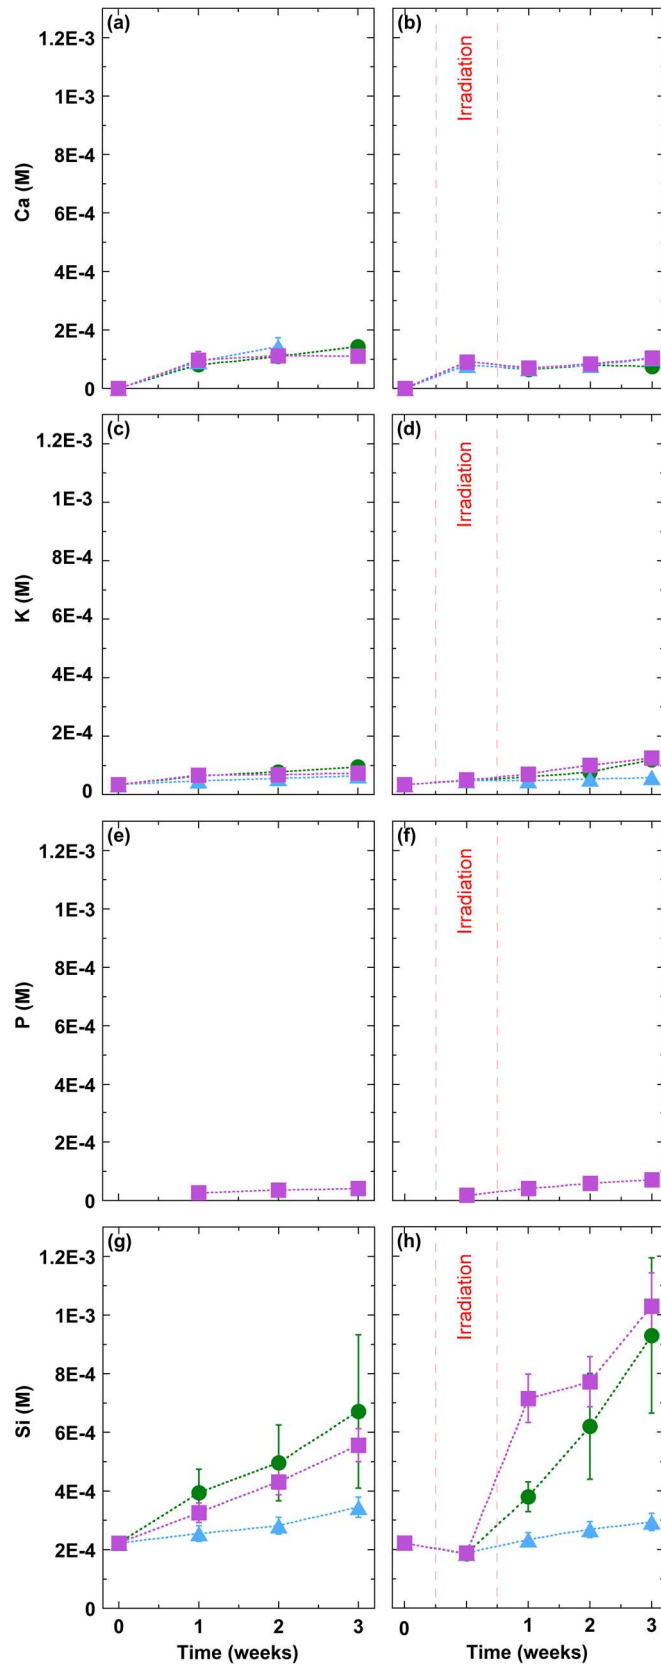

**Figure S4.** Ca, K, P and Si for (left) fresh and (right) irradiated sediments, throughout 3-week incubation under different O<sub>2</sub> conditions: green circles (●), 100% O<sub>2</sub> incubation; blue triangles (▲), 50% O<sub>2</sub> incubation and purple squares (■) 0% O<sub>2</sub> incubation. Error bars represent the standard deviation over the 3 replicates for each condition.

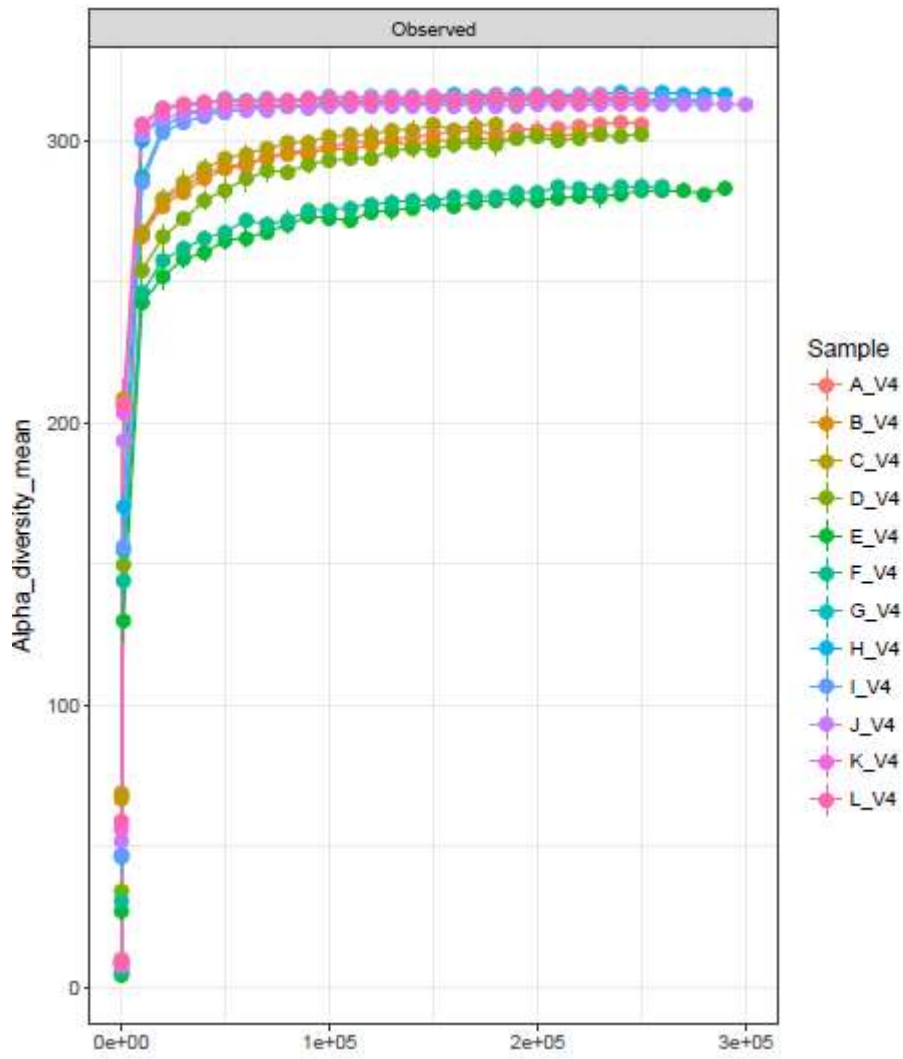

**Figure S5.** Rarefaction curves of observed OTU for analyzed samples (ABC initial sediment, DEF anoxic, GHI 100% oxic, JKL 50% oxic conditions).

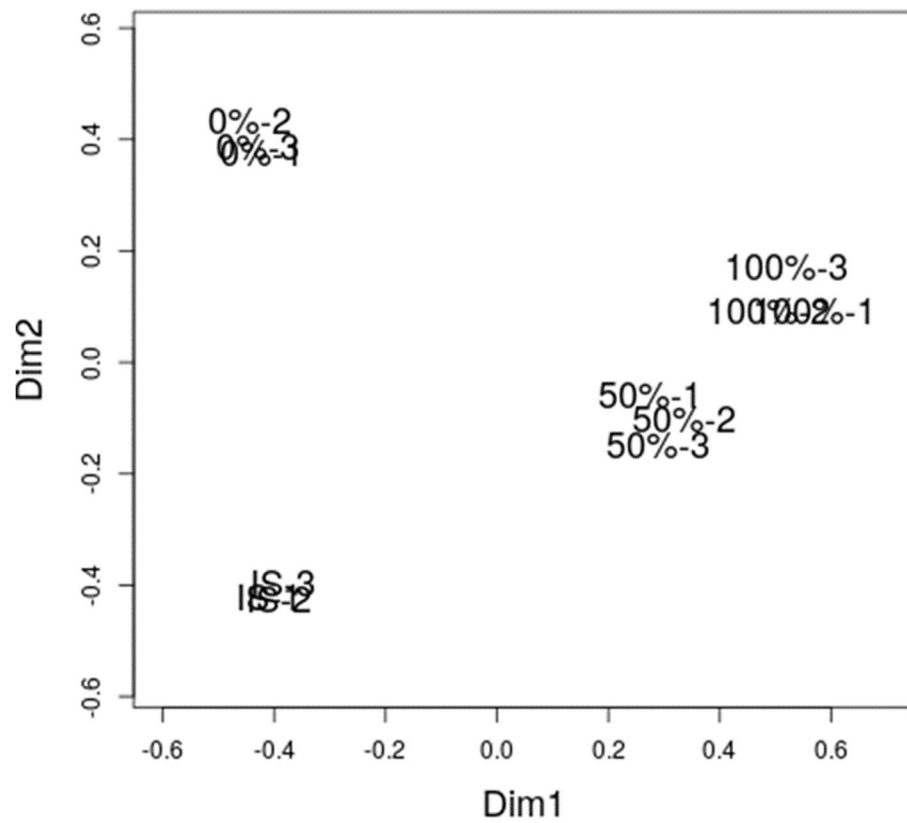

**Figure S6.** Non-parametric multidimensional scaling (NMDS) plot of prokaryotic communities associated for triplicate independent determinations for the Initial Sediments (IS) and after 3 weeks of incubation under different  $O_2$  conditions ( $100\% O_2$ ,  $50\% O_2$  and  $0\% O_2$  samples). Performed using the isoMDS function of the Vegan R package <sup>2</sup>



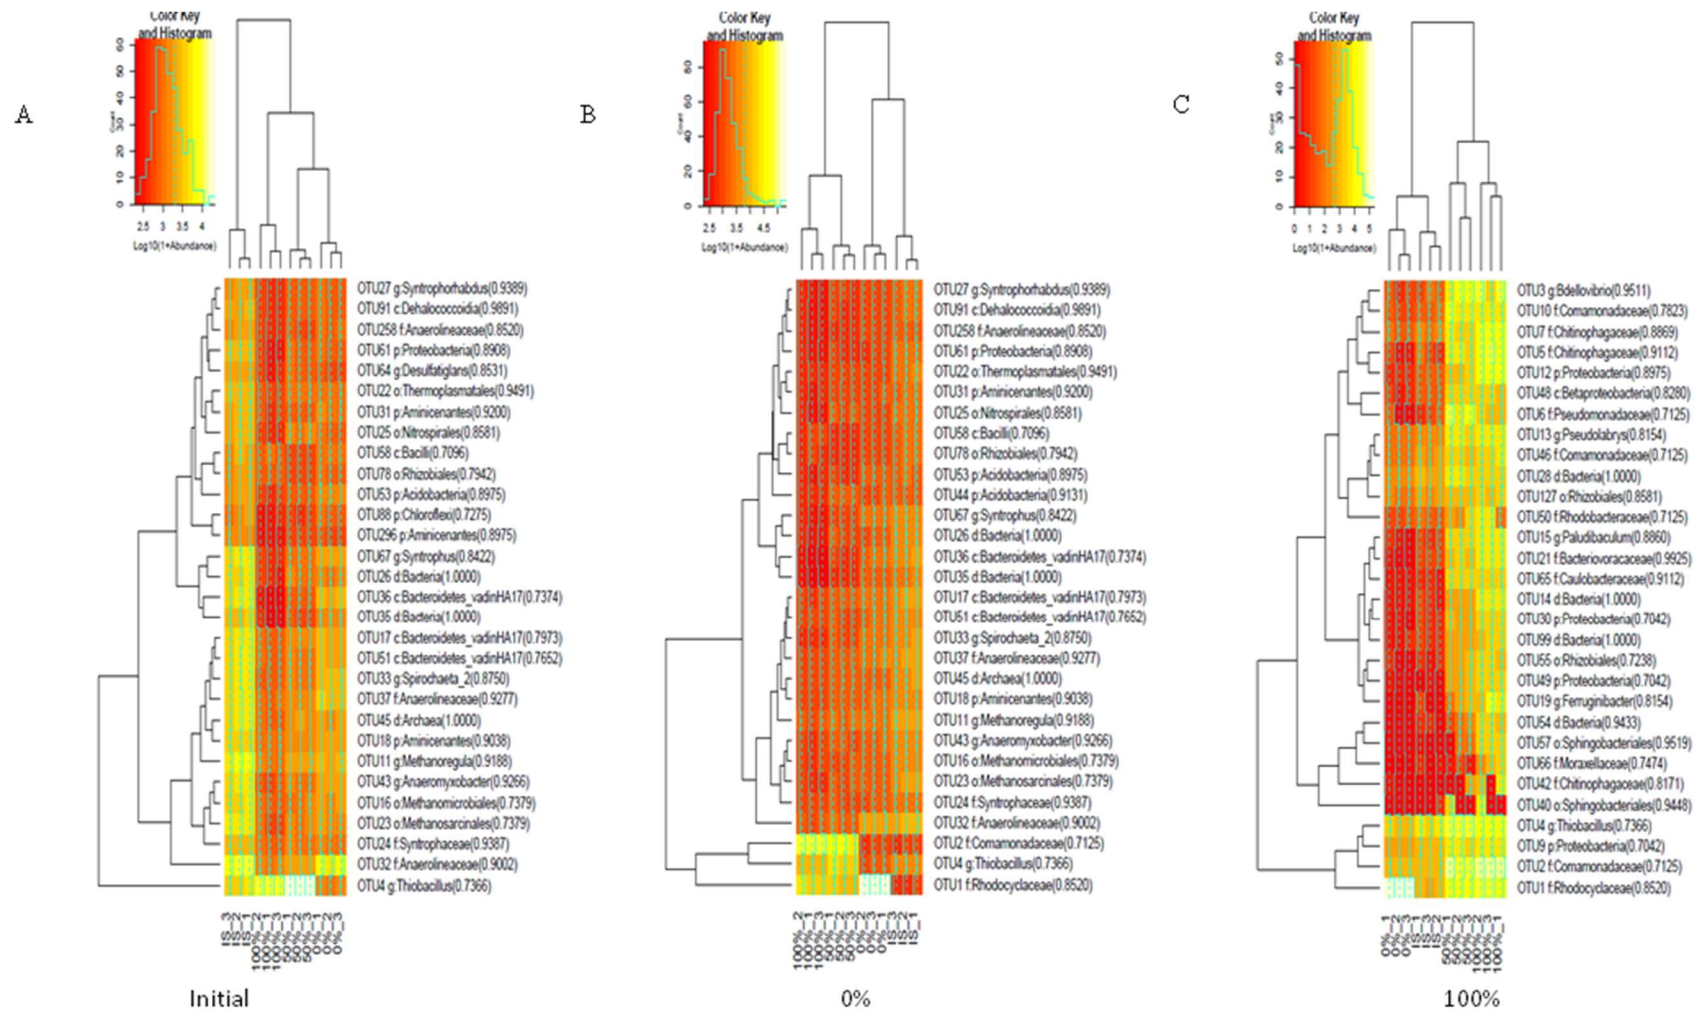

**Figure S7:** Heat map and hierarchical cluster analysis of log-transformed abundances of the 30 most abundant OTUs (based on raw abundances in treatment) for the initial sediments (A) and after 3 weeks of incubation under 0% O<sub>2</sub> (B), and 100% O<sub>2</sub> (C). The dendrogram represents complete linkage clustering. Assignments after OTUs numbers give the lowest taxonomic level associated with the OTU using the silva database k: kingdom, p: phylum, o: order, f: family, s: genus\_species. Values in brackets indicate sequence similarity.



**Table S1.** Richness and diversity indices of the initial and exposed prokaryotic communities for the initial sediments and after 3 weeks of incubation under different O<sub>2</sub> conditions (100% O<sub>2</sub>, 50% O<sub>2</sub> and 0% O<sub>2</sub> samples). All diversity statistics were calculated using a 97% sequence similarity outOTU threshold. Richness was calculated using the number of OTUs and Chao1 estimators. Diversity was estimated from Shannon index.

| Condition                     |        | initial |        |        | anoxia |        |        | 50% oxique |        |        | 100% oxique |        |  |
|-------------------------------|--------|---------|--------|--------|--------|--------|--------|------------|--------|--------|-------------|--------|--|
| number of sequence per sample | 449757 | 417808  | 334196 | 358108 | 388020 | 361316 | 404349 | 354278     | 356962 | 365926 | 382832      | 361921 |  |
| Observed OTUs                 | 310    | 306     | 311    | 308    | 288    | 290    | 313    | 316        | 315    | 314    | 317         | 315    |  |
| chao1 estimation              | 316    | 320     | 322    | 311    | 291    | 299    | 313    | 316        | 315    | 314    | 317         | 315    |  |
| Shannon index                 | 5.00   | 4.99    | 4.99   | 2.77   | 2.17   | 2.58   | 4.40   | 4.48       | 4.60   | 4.04   | 4.06        | 4.00   |  |



**Table S2.** Oxidation state of U in the solid determined by LC-LS fit of XANES data at the U L<sub>III</sub>-edge. The uncertainties on the measured values are given under brackets and refer to the last digit (see text).

| <b>Sample</b>                                             | <b><u>U(IV) (%)</u></b> | <b><u>U(VI) (%)</u></b> | <b><u>Sum (%)</u></b> | <b>R-factor</b> | <b><u>Chi<sup>2</sup> R</u></b> |
|-----------------------------------------------------------|-------------------------|-------------------------|-----------------------|-----------------|---------------------------------|
| <b>Fresh sediment T0</b>                                  | 86(21)                  | 14(21)                  | 100                   | 6.88E-5         | 2.29E-2                         |
| <b>Fresh sediment 0% O<sub>2</sub> - T3 weeks</b>         | 90(24)                  | 11(24)                  | 101                   | 8.79E-5         | 2.95E-2                         |
| <b>Fresh sediment 50% O<sub>2</sub> - T3 weeks</b>        | 100(0)                  | 1(2)                    | 101                   | 1.31E-4         | 4.29E-2                         |
| <b>Fresh sediment 100% O<sub>2</sub> - T3 weeks</b>       | 100(0)                  | 1(2)                    | 101                   | 1.96E-4         | 6.41E-2                         |
| <b>Irradiated sediment T0</b>                             | 65(22)                  | 35(22)                  | 100                   | 7.38E-5         | 2.46E-2                         |
| <b>Irradiated sediment 0% O<sub>2</sub> - T3 weeks</b>    | 51(21)                  | 49(21)                  | 100                   | 6.98E-5         | 2.33E-2                         |
| <b>Irradiated sediment 50% O<sub>2</sub> - T3 weeks</b>   | 97(28)                  | 3(28)                   | 100                   | 1.29E-4         | 4.20E-2                         |
| <b>Irradiated sediments 100% O<sub>2</sub> - T3 weeks</b> | 98(24)                  | 2(24)                   | 100                   | 8.75E-5         | 2.85E-2                         |

**Table S3.** Formation constants of minerals and complexes and their relevant reactions used for this study.

| Reaction                                                                                                       | log K (25°C)     | Ref.             |
|----------------------------------------------------------------------------------------------------------------|------------------|------------------|
| <i>Aqueous species</i>                                                                                         |                  |                  |
| $\text{UO}_{2(s)} + 4\text{H}^+ = \text{U}^{4+} + 2\text{H}_2\text{O}$                                         | 0.1              |                  |
| $\text{U}^{4+} + 4\text{CO}_3^{2-} = \text{U}(\text{CO}_3)_4^{4-}$                                             | 32.9             |                  |
| $\text{U}^{4+} + 5\text{CO}_3^{2-} = \text{U}(\text{CO}_3)_5^{6-}$                                             | 34.0             | Wateq4f database |
| $\text{U}^{4+} + 3\text{H}_2\text{O} = \text{U}(\text{OH})_3^+ + 3\text{H}^+$                                  | -4.935           |                  |
| $\text{U}^{4+} + 2\text{H}_2\text{O} = \text{U}(\text{OH})_2^{2+} + 2\text{H}^+$                               | -2.27            |                  |
| $\text{U}^{4+} + 4\text{H}_2\text{O} = \text{U}(\text{OH})_4^{\text{(aq)}} + 4\text{H}^+$                      | -8.498           |                  |
|                                                                                                                | 18.1 (pH = 5.50) |                  |
|                                                                                                                | 19.4 (pH = 5.90) |                  |
| $\text{U}^{4+} + \text{HHumic}^- = \text{Uhumic}^{2+} + \text{H}^+$                                            | 19.6 (pH = 5.98) | 3,4              |
|                                                                                                                | 19.8 (pH = 6.02) |                  |
|                                                                                                                | 23.0 (pH = 7.00) |                  |
|                                                                                                                | 24.3 (pH = 7.40) |                  |
| $\text{UO}_2^{2+} + 4\text{H}^+ + 2\text{e}^- = \text{U}^{4+} + 2\text{H}_2\text{O}$                           | 9.04             |                  |
| $\text{UO}_2^{2+} + \text{CO}_3^{2-} = \text{UO}_2(\text{CO}_3)^{\text{(aq)}}$                                 | 9.63             |                  |
| $\text{UO}_2^{2+} + 2\text{CO}_3^{2-} = \text{UO}_2(\text{CO}_3)_2^{2-}$                                       | 17.00            |                  |
| $\text{UO}_2^{2+} + 3\text{CO}_3^{2-} = \text{UO}_2(\text{CO}_3)_3^{4-}$                                       | 21.63            |                  |
| $\text{UO}_2^{2+} + \text{H}_2\text{O} = \text{UO}_2(\text{OH})^+ + \text{H}^+$                                | -5.2             |                  |
| $\text{UO}_2^{2+} + 3\text{H}_2\text{O} = \text{UO}_2(\text{OH})_3^- + 3\text{H}^+$                            | -19.2            | Wateq4f database |
| $\text{UO}_2^{2+} + 4\text{H}_2\text{O} = \text{UO}_2(\text{OH})_4^{2-} + 4\text{H}^+$                         | -33.0            |                  |
| $2\text{UO}_2^{2+} + \text{H}_2\text{O} = (\text{UO}_2)_2(\text{OH})_2^{3+} + \text{H}^+$                      | -2.7             |                  |
| $3\text{UO}_2^{2+} + 6\text{CO}_3^{2-} = (\text{UO}_2)_3(\text{CO}_3)_6^{6-}$                                  | 54.00            |                  |
| $3\text{UO}_2^{2+} + 4\text{H}_2\text{O} = (\text{UO}_2)_3(\text{OH})_4^{2+} + 4\text{H}^+$                    | -11.90           |                  |
| $3\text{UO}_2^{2+} + 5\text{H}_2\text{O} = (\text{UO}_2)_3(\text{OH})_5^+ + 5\text{H}^+$                       | -15.55           |                  |
| $3\text{UO}_2^{2+} + 7\text{H}_2\text{O} = (\text{UO}_2)_3(\text{OH})_7^- + 7\text{H}^+$                       | -31.00           | Wateq4f database |
| $4\text{UO}_2^{2+} + 7\text{H}_2\text{O} = (\text{UO}_2)_4(\text{OH})_7^+ + 7\text{H}^+$                       | -21.90           |                  |
| $\text{Ca}^{2+} + \text{UO}_2^{2+} + 3\text{CO}_3^{2-} = \text{CaUO}_2(\text{CO}_3)_3^{2-}$                    | 27.18            | 1                |
| $2\text{Ca}^{2+} + \text{UO}_2^{2+} + 3\text{CO}_3^{2-} = \text{Ca}_2\text{UO}_2(\text{CO}_3)_3^{\text{(aq)}}$ | 30.70            | 1                |
| $\text{UO}_2^+ + 3\text{CO}_3^- + \text{e}^- = \text{UO}_2(\text{CO}_3)_3^{5-}$                                | 7.43             | Wateq4f database |
| $\text{UO}_2^{2+} + \text{e}^- = \text{UO}_2^+$                                                                | 1.49             |                  |

---

|                                                                               |                  |     |
|-------------------------------------------------------------------------------|------------------|-----|
|                                                                               | -0.5 (pH = 5.50) |     |
|                                                                               | 0.1 (pH = 5.90)  |     |
| $\text{UO}_2^{2+} + \text{Hhumic}^- = \text{UO}_2\text{Humic}^+ + \text{H}^+$ | 0.2 (pH = 5.98)  | 3,4 |
|                                                                               | 0.3 (pH = 6.02)  |     |
|                                                                               | 1.7 (pH = 7.00)  |     |
|                                                                               | 2.4 (pH = 7.40)  |     |

*Minerals*

|                                                                               |        |                     |
|-------------------------------------------------------------------------------|--------|---------------------|
| $\text{Uraninite} + 4\text{H}^+ = \text{U}^{4+} + 2\text{H}_2\text{O}$        | -4.8   |                     |
| $\text{UO}_2(\text{a}) + 4\text{H}^+ = \text{U}^{4+} + 2\text{H}_2\text{O}$   | 0.1    |                     |
| $\text{Fe}_{2+} = \text{Fe}^{3+} + \text{e}^-$                                | -13.02 | Wateq4f<br>database |
| $\text{Fe}(\text{OH})_3 + 3\text{H}^+ = \text{Fe}^{3+} + 3\text{H}_2\text{O}$ | 4.89   |                     |
| $\text{Calcite} = \text{Ca}^{2+} + \text{CO}_3^{2-}$                          | -8.48  |                     |

---

**Table S4.** Calculation of aqueous U(IV) and U(VI) speciation and determination of major and minor U(IV) and U(VI) complexes at each set of experimental conditions with fresh sediments.

| Dissolved species                                                | Molality (M)                          | Percentage for each U(IV) and U(VI)-complex |
|------------------------------------------------------------------|---------------------------------------|---------------------------------------------|
|                                                                  | <b>0% O<sub>2</sub><sup>1</sup></b>   |                                             |
| Total U                                                          | 6.7.10 <sup>-8</sup>                  | 100                                         |
| Total HHumic <sup>-</sup>                                        | 8.3.10 <sup>-4</sup>                  | -                                           |
| Total Ca <sup>2+</sup>                                           | 1.1.10 <sup>-4</sup>                  | -                                           |
| Total HCO <sub>3</sub> <sup>-</sup>                              | 7.7.10 <sup>-4</sup>                  | -                                           |
| Total Fe                                                         | 9.3.10 <sup>-5</sup>                  |                                             |
| <b>CaUO<sub>2</sub>(CO<sub>3</sub>)<sub>2</sub><sup>2-</sup></b> | <b>4.8.10<sup>-8</sup></b>            | <b>71.9</b>                                 |
| UHumic <sup>2+</sup>                                             | 1.2.10 <sup>-8</sup>                  | 18.1                                        |
| UO <sub>2</sub> (CO <sub>3</sub> ) <sub>2</sub> <sup>2-</sup>    | 5.2.10 <sup>-9</sup>                  | 7.7                                         |
|                                                                  | <b>50% O<sub>2</sub><sup>2</sup></b>  |                                             |
| Total U                                                          | 1.6.10 <sup>-8</sup>                  | 100                                         |
| Total HHumic <sup>-</sup>                                        | 2.8.10 <sup>-5</sup>                  | -                                           |
| Total Ca <sup>2+</sup>                                           | 1.2.10 <sup>-4</sup>                  | -                                           |
| Total HCO <sub>3</sub> <sup>-</sup>                              | 6.9.10 <sup>-5</sup>                  | -                                           |
| Total Fe                                                         | <                                     |                                             |
| <b>UO<sub>2</sub>CO<sub>3</sub></b>                              | <b>1.2.10<sup>-8</sup></b>            | <b>77.1</b>                                 |
| UO <sub>2</sub> (OH) <sup>+</sup>                                | 1.5.10 <sup>-9</sup>                  | 9.6                                         |
| UO <sub>2</sub> <sup>2+</sup>                                    | 9.9.10 <sup>-10</sup>                 | 6.3                                         |
| UO <sub>2</sub> (CO <sub>3</sub> ) <sub>2</sub> <sup>2-</sup>    | 9.5.10 <sup>-10</sup>                 | 6.0                                         |
|                                                                  | <b>100% O<sub>2</sub><sup>3</sup></b> |                                             |
| Total U                                                          | 4.7.10 <sup>-8</sup>                  | 100                                         |
| Total HHumic <sup>-</sup>                                        | 3.4.10 <sup>-5</sup>                  | -                                           |
| Ca <sup>2+</sup>                                                 | 1.4.10 <sup>-4</sup>                  | -                                           |
| HCO <sub>3</sub> <sup>-</sup>                                    | 1.6.10 <sup>-4</sup>                  | -                                           |
| Total Fe                                                         | <                                     |                                             |
| <b>UO<sub>2</sub>CO<sub>3</sub></b>                              | <b>3.3.10<sup>-8</sup></b>            | <b>69.6</b>                                 |
| UO <sub>2</sub> (CO <sub>3</sub> ) <sub>3</sub> <sup>2-</sup>    | 8.7.10 <sup>-9</sup>                  | 18.6                                        |
| UO <sub>2</sub> (OH) <sup>+</sup>                                | 3.5.10 <sup>-9</sup>                  | 7.4                                         |
| CaUO <sub>2</sub> (CO <sub>3</sub> ) <sub>3</sub> <sup>2-</sup>  | 8.1.10 <sup>-10</sup>                 | 1.7                                         |

*Note : pH = <sup>1</sup>7.4, <sup>2</sup>5.5, <sup>3</sup>5.9 , < detection limit*



**Table S5.** Calculation of aqueous U(IV) and U(VI) speciation and determination of major and minor U(IV) and U(VI) complexes at each set of experimental conditions with irradiated sediments.

| Dissolved species                                                | Molality (M)               | Percentage for each U(IV) and U(VI)-complex |
|------------------------------------------------------------------|----------------------------|---------------------------------------------|
| <b>0% O<sub>2</sub><sup>1</sup></b>                              |                            |                                             |
| Total U                                                          | 1.6.10 <sup>-7</sup>       | 100                                         |
| Total HHumic <sup>-</sup>                                        | 8.6.10 <sup>-4</sup>       | -                                           |
| Total Ca <sup>2+</sup>                                           | 1.0.10 <sup>-4</sup>       | -                                           |
| Total HCO <sub>3</sub> <sup>-</sup>                              | 1.0.10 <sup>-3</sup>       | -                                           |
| Total Fe                                                         | 1.1.10 <sup>-4</sup>       | -                                           |
| <b>CaUO<sub>2</sub>(CO<sub>3</sub>)<sub>3</sub><sup>2-</sup></b> | <b>7.1.10<sup>-8</sup></b> | <b>45.2</b>                                 |
| UO <sub>2</sub> (CO <sub>3</sub> ) <sub>2</sub> <sup>2-</sup>    | 4.8.10 <sup>-8</sup>       | 30.6                                        |
| UHumic <sup>2+</sup>                                             | 1.8.10 <sup>-8</sup>       | 11.4                                        |
| UO <sub>2</sub> CO <sub>3</sub>                                  | 9.7.10 <sup>-9</sup>       | 6.1                                         |
| UO <sub>2</sub> Humate                                           | 8.2.10 <sup>-9</sup>       | 5.2                                         |
| <b>50% O<sub>2</sub><sup>2</sup></b>                             |                            |                                             |
| Total U                                                          | 1.3.10 <sup>-7</sup>       | 100                                         |
| Total HHumic <sup>-</sup>                                        | 5.4.10 <sup>-5</sup>       | -                                           |
| Total Ca <sup>2+</sup>                                           | 1.0.10 <sup>-4</sup>       | -                                           |
| Total HCO <sub>3</sub> <sup>-</sup>                              | 6.2.10 <sup>-4</sup>       | -                                           |
| Total Fe                                                         | 1.6.10 <sup>-5</sup>       | -                                           |
| <b>UO<sub>2</sub>CO<sub>3</sub></b>                              | <b>9.1.10<sup>-8</sup></b> | <b>69.8</b>                                 |
| UO <sub>2</sub> (OH) <sup>+</sup>                                | 1.6.10 <sup>-8</sup>       | 12.0                                        |
| UO <sub>2</sub> (CO <sub>3</sub> ) <sub>2</sub> <sup>2-</sup>    | 2.9.10 <sup>-8</sup>       | 1.6                                         |
| UO <sub>2</sub> Humate                                           | 4.4.10 <sup>-9</sup>       | 3.4                                         |
| <b>100% O<sub>2</sub><sup>3</sup></b>                            |                            |                                             |
| Total U                                                          | 1.6.10 <sup>-7</sup>       | 100                                         |
| Total HHumic <sup>-</sup>                                        | 6.1.10 <sup>-5</sup>       | -                                           |
| Total Ca <sup>2+</sup>                                           | 7.5.10 <sup>-5</sup>       | -                                           |
| Total HCO <sub>3</sub> <sup>-</sup>                              | 7.6.10 <sup>-4</sup>       | -                                           |
| Total Fe                                                         | 2.2.10 <sup>-5</sup>       | -                                           |
| <b>UO<sub>2</sub>CO<sub>3</sub></b>                              | <b>1.1.10<sup>-7</sup></b> | <b>68.8</b>                                 |
| UO <sub>2</sub> (OH) <sup>+</sup>                                | 1.9.10 <sup>-8</sup>       | 11.9                                        |
| UO <sub>2</sub> (CO <sub>3</sub> ) <sub>2</sub> <sup>2-</sup>    | 1.9.10 <sup>-8</sup>       | 11.8                                        |
| UO <sub>2</sub> Humate                                           | 7.5.10 <sup>-9</sup>       | 4.7                                         |

*Note : pH = <sup>4</sup>7.0 <sup>5</sup>5.98, <sup>6</sup>6.02 , < detection limit*

## References

1. W. Dong, S. C. Brooks, Determination of the formation constants of ternary complexes of uranyl and carbonate with alkaline earth metals ( $Mg^{2+}$ ,  $Ca^{2+}$ ,  $Sr^{2+}$ , and  $Ba^{2+}$ ) using anion exchange method, *Environ. Sci. Technol.*, 2006, 40, 4689-95.
2. J. Oksanen, F. G. Blanchet, M. Friendly, R. Kindt, P. Legendre, D. McGlinn, P. R. Minchin, P. R. B. O'Hara, G. L. Simpson, P. Solymos, M. Henry, H. Stevens, E. Szoecs, H. Wagner, Vegan: Community Ecology Package. R package version 2.4-5, 2017, <https://CRAN.R-project.org/package=vegan>.
3. P. E. Reiller, N. D. M. Evans, G. Szabo, Complexation parameters for the actinides(IV)-humic acid system: a search for consistency and application to laboratory and field observations, 2008, *Radiochim. Acta*, **2008**, 96, 345-358.
4. P. Warwick, N. Evans, A. Hall, G. Walker, E. Steigleder, Stability constants of U(VI) and U(IV)-humic acid complexes, *J. Radioanal. Nucl. Chem.*, **2005**, 266, 179-190.
